# Supplementary material for: A scanning probe microscopy study of nanostructured TiO2/poly(3-hexylthiophene) hybrid heterojunctions for photovoltaic applications
Source: publisher site journal article supplement (doi:10.3762/bjnano.9.197), 2018-08-01
Supplement: Additional file 1 [file 2190-4286-9-197-S1.pdf]

# Supporting Information

for

## **A scanning probe microscopy study of nanostructured TiO<sub>2</sub>/poly(3-hexylthiophene) hybrid heterojunctions for photovoltaic applications**

Laurie Letertre<sup>1</sup>, Roland Roche<sup>2</sup>, Olivier Douhéret<sup>3</sup>, Hailu G. Kassa<sup>1</sup>, Denis Mariolle<sup>4,5</sup>,  
Nicolas Chevalier<sup>4,5</sup>, Łukasz Borowik<sup>4,5</sup>, Philippe Dumas<sup>2</sup>, Benjamin Grévin<sup>4,6</sup>, Roberto  
Lazzaroni<sup>1,3</sup> and Philippe Leclère<sup>\*1</sup>

Address: <sup>1</sup>Laboratory for Chemistry of Novel Materials - Center for Innovation and Research  
in Materials and Polymers - CIRMAP, University of Mons, Mons, Belgium, <sup>2</sup>Aix Marseille  
Univ, CNRS, Centre Interdisciplinaire de Nanoscience de Marseille (CiNaM), Marseille,  
France, <sup>3</sup>Materia-Nova R&D Center, Mons, Belgium, <sup>4</sup>Université Grenoble Alpes, F-38000  
Grenoble, France, <sup>5</sup>CEA, LETI, Campus MINATEC, F-38054 Grenoble, France and  
<sup>6</sup>UMR5819 SYMMES CEA-CNRS-UGA, 17 rue des Martyrs F-38054, Grenoble, France

Email: Philippe Leclère - Philippe.LECLERE@umons.ac.be

\* Corresponding author

## Supporting Information

Figure S1a shows a FM-AFM height image obtained in UHV over a  $3800 \times 400 \text{ nm}^2$  area astride the step edge between a 200 nm thick nano-structured  $\text{TiO}_2/\text{P3HT-COOH}$  HHJ (right part of the image) and the area of the ITO-glass substrate left uncovered (left part of the image).

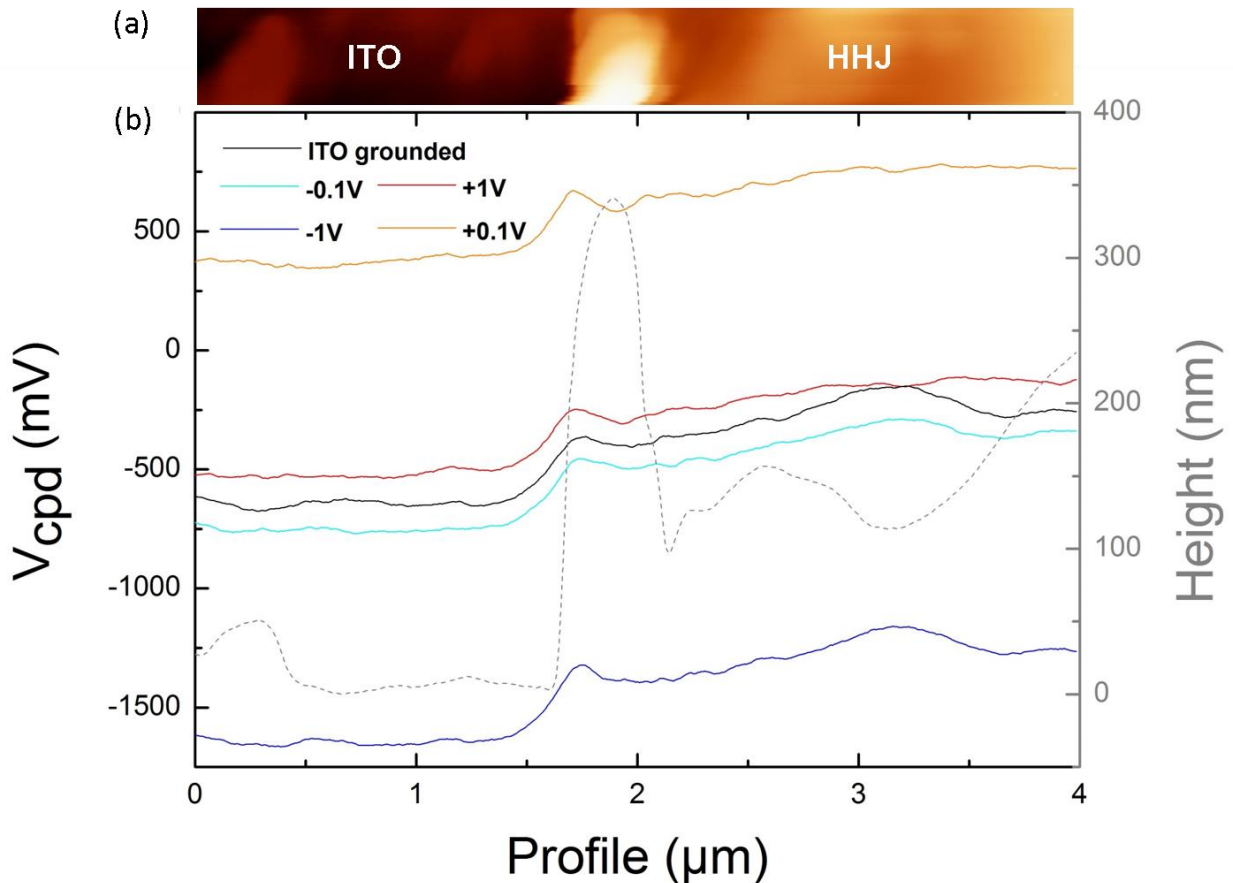

**Figure S1:** (a) FM-AFM height image in UHV over a  $3800 \times 400 \text{ nm}^2$  scan size astride the interface of a 200 nm-thick nano-structured  $\text{TiO}_2/\text{P3HT-COOH}$  HHJ (right part of the image) and the ITO electrode lying below (left part of the image). FM-AFM parameters: -5 Hz of frequency shift setpoint and 50 mV of amplitude setpoint. (b)  $V_{\text{cpd}}$  profiles extracted from the corresponding  $V_{\text{cpd}}$  image (along the full length of the scanned area) for different DC sample biases, without illumination, and superimposed to the corresponding height profile. FM-KPFM parameters : frequency and amplitude of the electrical excitation : 958 Hz and 600 mV.

Such a measurement allows observing the  $V_{\text{cpd}}$  step across the ITO/HHJ step for different biases applied to the ITO electrode. The absence of floating potential is expected to lead to a conservation of the  $V_{\text{cpd}}$  step, with a global shift of the entire

$V_{\text{cpd}}$  profile according to the DC sample bias value (up-shift for positive bias and vice versa). In order to visualize this  $V_{\text{cpd}}$  step profile for each applied bias, Figure S1b shows cross-sections extracted from the corresponding  $V_{\text{cpd}}$  image along the total length of the scanned area, at different lines corresponding to different DC sample biases, without illumination. A cross-section extracted from Figure S1a illustrates the typical height profile corresponding to the  $V_{\text{cpd}}$  cross-sections. The measured amplitude of the  $V_{\text{cpd}}$  step averaged over the 6 profiles is  $(405 \pm 11)$  mV. The small standard deviation of the average value of the  $V_{\text{cpd}}$  step (inferior to 3%) indicates negligible variations of the  $V_{\text{cpd}}$  step with the magnitude of the applied bias on the ITO electrode. This shows the absence of a floating potential across the ITO/HHJ stacking.

Figure S2 shows the superimposed profiles of the FM-KPFM height and  $V_{\text{cpd}}$  recorded in UHV along a given scan line over a nano-structured  $\text{TiO}_2$  film. The measurement was performed successively with and without illumination. It can be seen that negligible change in the topography appears, ensuring the absence of light-induced artefacts in the topography recording. A very good matching of the  $V_{\text{cpd}}$  profiles is observed as well: only small discrepancies not exceeding 25 mV are measured between the two curves. This value is negligible in relation to the overall variation amplitude of the  $V_{\text{cpd}}$  signal across the image. On a more general view, the averaged  $V_{\text{cpd}}$  values without illumination and upon illumination are  $(905 \pm 58)$  mV and  $(890 \pm 55)$  mV, respectively. The difference between the averages is contained within the standard deviation. We can therefore conclude that, if any photovoltaic effect intrinsic to the ITO/  $\text{TiO}_2$  system is present, it is very small.

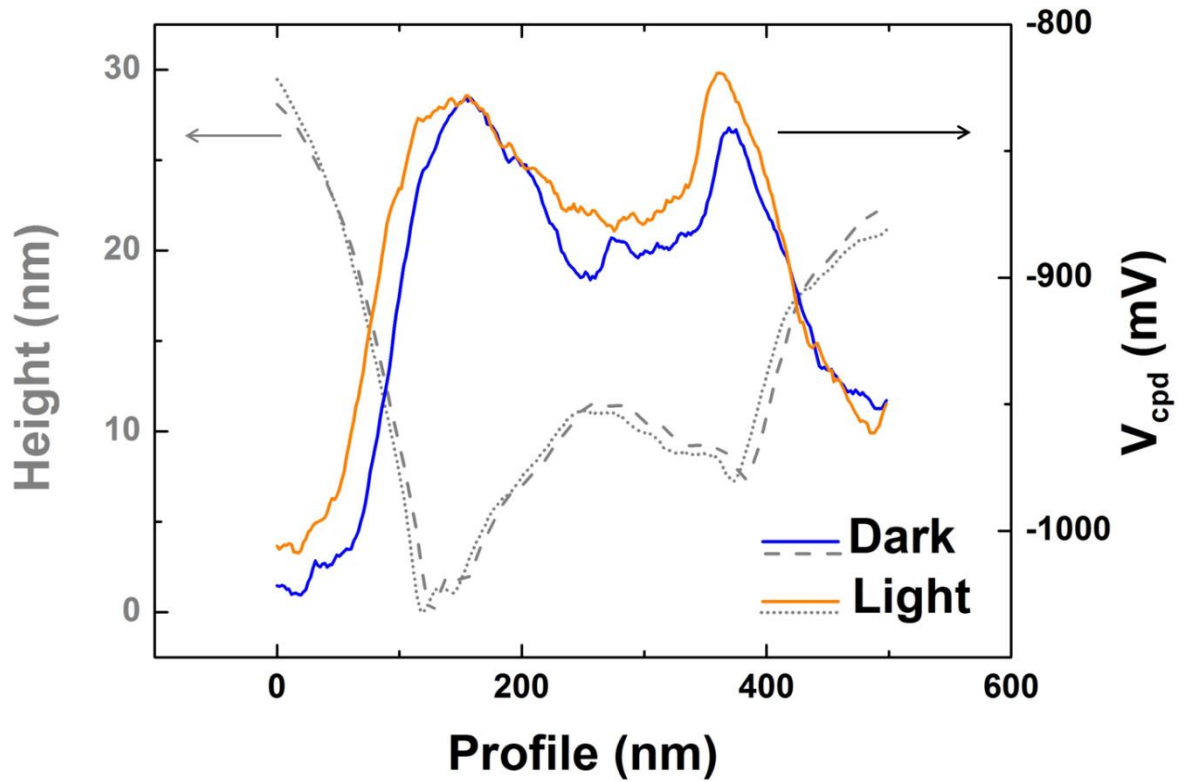

**Figure S2:** FM-KPFM height and  $V_{\text{cpd}}$  profiles over a nano-structured  $\text{TiO}_2$  film deposited on an ITO electrode, recorded with and without illumination. The measurement was performed in UHV. FM-AFM parameters: -22 Hz of frequency shift setpoint and 40 mV of amplitude setpoint. FM-KPFM parameters: frequency and amplitude of the electrical excitation : 958 Hz and 600 mV.
